# Supplementary material for: Production of monocyclic aromatic hydrocarbons by segmented in situ and ex situ two-stage coupled catalytic co-pyrolysis of biomass and waste plastics
Source: Royal Society of Chemistry journal article supplement (doi:10.1039/d2gc03086a), 2022-01-01
Supplement: d2gc03086a1.pdf [file d2gc03086a1.pdf]

## **Electronic Supplementary Information (ESI)**

### **Production of monocyclic aromatic hydrocarbons by segmented in-situ and ex-situ two-stage coupled catalytic co-pyrolysis of biomass and waste plastics**

Xiaojie Tian <sup>a</sup>, Xinyu Bian <sup>a</sup>, Zihong Zeng <sup>a</sup>, Jiamin Xu <sup>a</sup>, Anqi Dai <sup>a</sup>, Linyao Ke <sup>a</sup>, Yuan  
Zeng <sup>a</sup>, Qiu hao Wu <sup>a</sup>, Yuhuan Liu <sup>a, b</sup>, Kirk Cobb <sup>b</sup>, Roger Ruan <sup>a, b</sup>, Yunpu Wang <sup>a, b\*</sup>

<sup>a</sup> State Key Laboratory of Food Science and Technology, Engineering Research Center  
for Biomass Conversion, Ministry of Education, Nanchang University, Nanchang  
330047, China

<sup>b</sup> Center for Biorefining and Department of Bioproducts and Biosystems Engineering  
University of Minnesota, 1390 Eckles Ave., St. Paul MN 55108, USA

\* Corresponding authors at: Engineering Research Center for Biomass Conversion,  
Ministry of Education, Nanchang University, Nanchang, Jiangxi 330047, China.

E-mail address: wangyunpu@ncu.edu.cn (Yunpu Wang)

## Table of Contents

**Table. S1.** Product yields under different experimental conditions.

**Table. S2.** Relative content of the main component types of the liquid products under different experimental conditions.

**Table. S3.** Carbon number distribution of liquid products under different experimental conditions (Unit: wt%).

**Table. S4.** Carbon number distribution of aliphatic hydrocarbons in liquid products under different experimental conditions. (Unit: wt%).

**Table. S5.** Main compounds identified in liquid products. (Unit: wt%).

**Fig. S1.** Dimensioned schematic diagram of the segmented co-pyrolysis device. (1) Pyrolysis raw material heating device; (2) Catalyst heating device; (3) Ex-situ catalyst (globosity HZSM-5); (4) Quartz boat with CAS samples; (5) Quartz boat with LDPE samples.

**Table. S1.** Product yields under different experimental conditions.

|                                | Solid products<br>(wt%) |       | Liquid products<br>(wt%) |       | Gas (wt%) |       | Wax (wt%) |       |
|--------------------------------|-------------------------|-------|--------------------------|-------|-----------|-------|-----------|-------|
| CAS                            | 18.21                   | ±2.17 | 32.00                    | ±1.49 | 49.80     | ±1.69 | -         |       |
| 3Fe/CAS                        | 19.53                   | ±1.37 | 33.00                    | ±1.82 | 47.48     | ±1.77 | -         |       |
| 5Fe/CAS                        | 8.35                    | ±1.23 | 35.00                    | ±1.01 | 56.65     | ±0.59 | -         |       |
| 7Fe/CAS                        | 4.29                    | ±0.46 | 33.00                    | ±1.28 | 62.71     | ±1.75 | -         |       |
| 10Fe/CAS                       | 5.97                    | ±0.59 | 38.00                    | ±1.07 | 56.03     | ±1.55 | -         |       |
| LDPE                           | 10.07                   | ±1.66 | 34.02                    | ±1.19 | 55.91     | ±0.80 | -         |       |
| 3M/LDPE                        | 8.12                    | ±1.33 | 41.00                    | ±1.56 | 50.88     | ±1.52 | -         |       |
| 5M/LDPE                        | 11.90                   | ±1.83 | 41.00                    | ±1.37 | 47.10     | ±0.91 | -         |       |
| 7M/LDPE                        | 8.46                    | ±1.21 | 39.00                    | ±1.70 | 52.54     | ±1.72 | -         |       |
| 10M/LDPE                       | 10.15                   | ±0.97 | 38.00                    | ±1.58 | 51.85     | ±1.76 | -         |       |
| I                              | 10.54                   | ±2.10 | 52.00                    | ±1.62 | 37.46     | ±0.97 |           |       |
| II                             | 11.88                   | ±1.29 | 46.00                    | ±1.25 | 42.12     | ±1.11 | -         |       |
| III                            | 0.00                    |       | 42.00                    | ±1.15 | 58.00     | ±1.25 | -         |       |
| IV                             | 0.00                    |       | 46.00                    | ±1.29 | 54.00     | ±1.20 | -         |       |
| V                              | 6.76                    | ±0.57 | 41.00                    | ±1.34 | 52.24     | ±1.75 | -         |       |
| VI (Segmented co-pyrolysis)    | 7.25                    | ±2.22 | 39.00                    | ±1.77 | 51.75     | ±2.67 | 2.00      | ±0.43 |
| Traditional mixed co-pyrolysis | 15.11                   | ±2.01 | 41.29                    | ±1.14 | 27.12     | ±3.83 | 16.49     | ±3.05 |

**Table. S2.** Relative content of the main component types of the liquid products under different experimental conditions.

|                                | Ketones<br>(wt%) | Acids<br>(wt%) | Phenols<br>(wt%) | Furans<br>(wt%) | Toluene<br>(wt%) | Xylene<br>(wt%) | Alkylbenzene<br>(wt%) | MAHs<br>(wt%) | Olefins<br>(wt%) | Alkanes<br>(wt%) | PAHs<br>(wt%) |
|--------------------------------|------------------|----------------|------------------|-----------------|------------------|-----------------|-----------------------|---------------|------------------|------------------|---------------|
| CAS                            | 5.65±0.42        | 14.58±0.86     | 37.86±3.50       | 33.06±1.73      | 0.27±0.10        | 0.08±0.02       | 0.92±0.19             | 1.08±0.25     | 0.16±0.05        | 1.66±0.61        | 0.27±0.16     |
| 3Fe/CAS                        | 5.04±0.18        | 5.17±1.09      | 28.34±1.99       | 40.88±2.15      | 0.87±0.20        | 0.72±0.17       | 2.47±0.35             | 2.47±0.19     | 3.43±0.42        | 3.30±0.45        | 0.00          |
| 5Fe/CAS                        | 6.43±0.98        | 3.66±1.10      | 33.82±0.35       | 42.38±2.12      | 0.80±0.42        | 1.02±0.27       | 2.03±1.09             | 2.03±0.40     | 2.75±0.13        | 2.62±0.44        | 0.00          |
| 7Fe/CAS                        | 3.96±0.39        | 9.67±1.54      | 16.29±1.37       | 61.08±2.96      | 0.28±0.13        | 0.48±0.13       | 1.52±0.38             | 1.64±0.36     | 2.44±0.35        | 1.72±0.53        | 0.49±0.30     |
| 10Fe/CAS                       | 5.16±2.08        | 11.10±1.40     | 27.97±1.61       | 45.42±1.37      | 1.10±0.38        | 2.47±0.25       | 5.25±0.59             | 5.36±0.49     | 2.13±0.31        | 1.18±0.22        | 0.43±0.14     |
| LDPE                           | 5.73±0.45        | 7.73±0.48      | 37.86±1.32       | 13.56±1.45      | 3.23±0.19        | 8.80±0.75       | 19.80±1.86            | 20.70±1.57    | 4.60±0.55        | 5.43±0.42        | 1.74±0.14     |
| 3M/LDPE                        | 0.30±0.12        | 0.00           | 6.77±0.61        | 1.60±0.24       | 10.27±0.85       | 21.57±2.79      | 61.18±3.49            | 67.09±1.78    | 11.71±1.12       | 2.86±0.55        | 7.20±0.24     |
| 5M/LDPE                        | 0.00             | 0.00           | 7.73±0.67        | 1.03±0.25       | 11.00±1.02       | 23.89±1.89      | 66.62±2.88            | 72.75±1.32    | 8.57±1.59        | 0.00             | 8.93±0.51     |
| 7M/LDPE                        | 0.00             | 0.00           | 8.81±0.65        | 1.58±0.23       | 9.91±0.85        | 22.86±1.68      | 61.59±1.99            | 67.11±2.59    | 13.58±1.14       | 1.05±0.36        | 6.04±0.36     |
| 10M/LDPE                       | 0.30±0.08        | 0.00           | 9.64±0.65        | 1.92±0.30       | 8.61±1.85        | 19.83±2.47      | 57.26±1.28            | 64.02±1.64    | 15.62±1.36       | 0.41±0.26        | 6.47±0.38     |
| I                              | 2.25±0.15        | 4.07±0.23      | 36.82±0.78       | 53.10 ±1.67     | 0.04±0.03        | 0.04±0.01       | 0.08±0.01             | 0.46±0.16     | 0.10±0.10        | 0.23±0.11        | 0.71±0.30     |
| II                             | 3.96±0.39        | 9.67±1.54      | 16.29±1.37       | 61.08 ±2.96     | 0.28±0.13        | 0.48±0.13       | 1.52±0.38             | 1.64±0.36     | 2.44±0.35        | 1.72±0.53        | 0.49±0.30     |
| III                            | 0.00             | 0.00           | 0.00             | 0.00            | 0.00             | 0.50±0.23       | 1.93±0.63             | 1.93±0.63     | 75.61±4.77       | 19.88±4.06       | 0.00          |
| IV                             | 0.00             | 0.00           | 0.00             | 0.00            | 19.72±0.62       | 41.73±1.47      | 94.08±2.10            | 94.99±2.42    | 0.00             | 0.00             | 5.01±0.45     |
| V                              | 0.00             | 0.00           | 2.14±0.60        | 3.18±0.94       | 5.43±0.40        | 15.84±1.60      | 51.08±2.04            | 55.80±1.93    | 13.31±0.75       | 13.89±1.25       | 4.17±0.79     |
| VI (Segmented co-pyrolysis)    | 0.20±0.20        | 0.00           | 0.26±0.12        | 2.63±0.85       | 11.52±1.29       | 27.15±3.84      | 68.39±6.37            | 72.01±4.54    | 11.25±3.56       | 2.35±1.09        | 8.83±1.87     |
| Traditional mixed co-pyrolysis | 0.00             | 0.00           | 1.07±0.32        | 3.66±0.24       | 4.90±0.15        | 18.42±1.78      | 53.67±2.28            | 58.48±2.21    | 8.83±0.84        | 14.77±2.15       | 7.26±3.21     |

**Table. S3.** Carbon number distribution of liquid products under different experimental conditions (Unit: wt%).

|     | CAS   | 3Fe/<br>CAS | 5Fe/<br>CAS | 7Fe/<br>CAS | 10Fe/<br>CAS | LDPE  | 3M/<br>LDPE | 5M/<br>LDPE | 7M/<br>LDPE | 10M/<br>LDPE | I     | II    | III   | IV    | V     | VI<br>(Segmented<br>co-pyrolysis) | Traditional<br>mixed co-<br>pyrolysis |
|-----|-------|-------------|-------------|-------------|--------------|-------|-------------|-------------|-------------|--------------|-------|-------|-------|-------|-------|-----------------------------------|---------------------------------------|
| C5  | 23.52 | 34.18       | 34.44       | 49.34       | 38.16        | 12.54 | 1.34        | 1.03        | 1.17        | 1.19         | 35.55 | 49.34 | 0.00  | 0.00  | 1.76  | 1.02                              | 2.47                                  |
| C6  | 19.08 | 19.18       | 21.62       | 17.36       | 21.09        | 11.40 | 3.34        | 3.43        | 2.53        | 2.36         | 19.84 | 17.36 | 1.47  | 0.91  | 2.00  | 1.89                              | 1.72                                  |
| C7  | 20.65 | 11.63       | 9.12        | 4.39        | 8.92         | 13.77 | 17.50       | 16.29       | 16.30       | 14.67        | 7.08  | 4.39  | 4.86  | 19.72 | 10.01 | 16.81                             | 6.27                                  |
| C8  | 8.83  | 4.74        | 5.42        | 2.28        | 3.90         | 19.93 | 34.37       | 34.88       | 36.24       | 34.02        | 8.16  | 2.28  | 10.84 | 47.86 | 25.59 | 36.65                             | 24.49                                 |
| C9  | 3.93  | 1.42        | 1.89        | 1.08        | 1.91         | 9.22  | 19.37       | 20.82       | 21.06       | 21.58        | 3.68  | 1.08  | 14.75 | 22.13 | 21.03 | 20.29                             | 20.72                                 |
| C10 | 2.25  | 7.77        | 10.46       | 7.55        | 6.76         | 10.27 | 12.38       | 13.17       | 13.51       | 14.63        | 11.36 | 7.55  | 20.49 | 6.26  | 12.11 | 8.26                              | 11.71                                 |
| C11 | 0.69  | 1.47        | 6.25        | 1.21        | 4.28         | 4.32  | 7.35        | 7.41        | 6.87        | 7.35         | 7.16  | 1.21  | 9.74  | 3.12  | 7.57  | 4.95                              | 8.87                                  |
| C12 | 1.00  | 5.28        | 1.51        | 0.96        | 0.48         | 1.00  | 2.57        | 2.20        | 1.71        | 2.65         | 0.12  | 0.96  | 10.22 | 0.00  | 3.11  | 3.00                              | 4.42                                  |
| C13 | 0.15  | 0.11        | 0.96        | 0.27        | 0.38         | 0.45  | 0.32        | 0.77        | 0.34        | 1.09         | 0.00  | 0.27  | 7.41  | 0.00  | 1.67  | 0.56                              | 1.71                                  |
| C14 | 0.71  | 0.68        | 1.30        | 0.77        | 0.08         | 0.89  | 0.26        | 0.00        | 0.00        | 0.00         | 0.59  | 0.77  | 2.07  | 0.00  | 2.13  | 0.00                              | 2.65                                  |
| C15 | 0.00  | 0.83        | 0.75        | 0.15        | 0.00         | 1.14  | 0.22        | 0.00        | 0.00        | 0.00         | 0.67  | 0.15  | 2.38  | 0.00  | 1.61  | 0.06                              | 2.16                                  |
| C16 | 0.00  | 0.99        | 0.52        | 0.60        | 0.41         | 0.84  | 0.33        | 0.00        | 0.28        | 0.00         | 0.10  | 0.60  | 1.05  | 0.00  | 1.30  | 0.00                              | 1.37                                  |
| C17 | 0.45  | 1.34        | 0.74        | 0.47        | 0.00         | 0.49  | 0.19        | 0.00        | 0.00        | 0.07         | 0.00  | 0.47  | 5.13  | 0.00  | 1.63  | 0.33                              | 2.08                                  |
| C18 | 0.00  | 2.45        | 0.36        | 0.34        | 0.11         | 0.48  | 0.30        | 0.00        | 0.00        | 0.31         | 0.00  | 0.34  | 1.24  | 0.00  | 0.95  | 0.08                              | 1.08                                  |
| C19 | 0.00  | 0.51        | 0.56        | 0.00        | 0.00         | 0.27  | 0.00        | 0.00        | 0.00        | 0.00         | 0.10  | 0.00  | 0.93  | 0.00  | 2.16  | 0.00                              | 2.84                                  |
| C20 | 0.10  | 2.01        | 0.43        | 0.14        | 0.00         | 0.40  | 0.00        | 0.00        | 0.00        | 0.00         | 0.00  | 0.14  | 4.34  | 0.00  | 1.61  | 4.65                              | 1.21                                  |
| C21 | 0.30  | 0.09        | 0.00        | 0.00        | 0.15         | 0.00  | 0.00        | 0.00        | 0.00        | 0.00         | 0.00  | 0.00  | 0.55  | 0.00  | 0.90  | 0.49                              | 1.15                                  |

**Table. S4.** Carbon number distribution of aliphatic hydrocarbons in liquid products under different experimental conditions. (Unit: wt%).

|     | LDPE  | 3M/LDPE | 5M/LDPE | 7M/LDPE | 10M/LDPE | I     | II    | III   | IV    | V     | VI<br>(Segmented<br>co-pyrolysis) | Traditional mixed<br>co-pyrolysis |
|-----|-------|---------|---------|---------|----------|-------|-------|-------|-------|-------|-----------------------------------|-----------------------------------|
| C5  | 12.54 | 1.34    | 1.03    | 1.17    | 1.19     | 35.55 | 49.34 | 0.00  | 0.00  | 1.76  | 1.02                              | 2.47                              |
| C6  | 11.40 | 3.34    | 3.43    | 2.53    | 2.36     | 19.84 | 17.36 | 1.47  | 0.91  | 2.00  | 1.89                              | 1.72                              |
| C7  | 13.77 | 17.50   | 16.29   | 16.30   | 14.67    | 7.08  | 4.39  | 4.86  | 19.72 | 10.01 | 16.81                             | 6.27                              |
| C8  | 19.93 | 34.37   | 34.88   | 36.24   | 34.02    | 8.16  | 2.28  | 10.84 | 47.86 | 25.59 | 36.65                             | 24.49                             |
| C9  | 9.22  | 19.37   | 20.82   | 21.06   | 21.58    | 3.68  | 1.08  | 14.75 | 22.13 | 21.03 | 20.29                             | 20.72                             |
| C10 | 10.27 | 12.38   | 13.17   | 13.51   | 14.63    | 11.36 | 7.55  | 20.49 | 6.26  | 12.11 | 8.26                              | 11.71                             |
| C11 | 4.32  | 7.35    | 7.41    | 6.87    | 7.35     | 7.16  | 1.21  | 9.74  | 3.12  | 7.57  | 4.95                              | 8.87                              |
| C12 | 1.00  | 2.57    | 2.20    | 1.71    | 2.65     | 0.12  | 0.96  | 10.22 | 0.00  | 3.11  | 3.00                              | 4.42                              |
| C13 | 0.45  | 0.32    | 0.77    | 0.34    | 1.09     | 0.00  | 0.27  | 7.41  | 0.00  | 1.67  | 0.56                              | 1.71                              |
| C14 | 0.89  | 0.26    | 0.00    | 0.00    | 0.00     | 0.59  | 0.77  | 2.07  | 0.00  | 2.13  | 0.00                              | 2.65                              |
| C15 | 1.14  | 0.22    | 0.00    | 0.00    | 0.00     | 0.67  | 0.15  | 2.38  | 0.00  | 1.61  | 0.06                              | 2.16                              |
| C16 | 0.84  | 0.33    | 0.00    | 0.28    | 0.00     | 0.10  | 0.60  | 1.05  | 0.00  | 1.30  | 0.00                              | 1.37                              |
| C17 | 0.49  | 0.19    | 0.00    | 0.00    | 0.07     | 0.00  | 0.47  | 5.13  | 0.00  | 1.63  | 0.33                              | 2.08                              |
| C18 | 0.48  | 0.30    | 0.00    | 0.00    | 0.31     | 0.00  | 0.34  | 1.24  | 0.00  | 0.95  | 0.08                              | 1.08                              |
| C19 | 0.27  | 0.00    | 0.00    | 0.00    | 0.00     | 0.10  | 0.00  | 0.93  | 0.00  | 2.16  | 0.00                              | 2.84                              |
| C20 | 0.40  | 0.00    | 0.00    | 0.00    | 0.00     | 0.00  | 0.14  | 4.34  | 0.00  | 1.61  | 4.65                              | 1.21                              |
| C21 | 0.00  | 0.00    | 0.00    | 0.00    | 0.00     | 0.00  | 0.00  | 0.55  | 0.00  | 0.90  | 0.49                              | 1.15                              |

**Table. S5.** Main compounds identified in liquid products. (Unit: wt%).

| Compounds                                           | CAS   | 3Fe/<br>CAS | 5Fe/<br>CAS | 7Fe/<br>CAS | 10Fe/<br>CAS | LDPE | 3M/<br>LDPE | 5M/<br>LDPE | 7M/<br>LDPE | 10M/<br>LDPE | I     | II    | III  | IV    | V     | VI<br>(Segmented<br>co-pyrolysis) | Traditional<br>mixed co-<br>pyrolysis |
|-----------------------------------------------------|-------|-------------|-------------|-------------|--------------|------|-------------|-------------|-------------|--------------|-------|-------|------|-------|-------|-----------------------------------|---------------------------------------|
| Furfural                                            | 10.62 | 26.28       | 26.43       | 45.37       | 29.74        | 5.29 | 1.04        | 1.03        | 1.17        | 1.19         | 30.89 | 45.37 | 0.00 | 0.00  | 1.69  | 0.80                              | 2.47                                  |
| Benzene, 1,3-dimethyl-                              | 0.00  | 0.00        | 0.00        | 0.48        | 0.00         | 5.17 | 18.51       | 20.02       | 19.51       | 16.76        | 0.00  | 0.48  | 0.00 | 4.51  | 13.26 | 24.16                             | 15.86                                 |
| Toluene                                             | 0.27  | 0.87        | 0.80        | 0.28        | 1.10         | 3.23 | 10.27       | 11.00       | 9.91        | 8.61         | 0.04  | 0.28  | 0.00 | 19.72 | 5.43  | 11.52                             | 4.90                                  |
| 2-<br>Furancarboxaldehyde,<br>5-methyl-             | 6.46  | 7.61        | 6.86        | 7.93        | 6.32         | 2.21 | 0.00        | 0.00        | 0.00        | 0.00         | 9.10  | 7.93  | 0.00 | 0.00  | 0.56  | 0.00                              | 0.62                                  |
| Acetic acid                                         | 13.44 | 2.95        | 2.70        | 8.24        | 8.33         | 6.26 | 0.00        | 0.00        | 0.00        | 0.00         | 3.39  | 8.24  | 0.00 | 0.00  | 0.00  | 0.00                              | 0.00                                  |
| Phenol                                              | 7.67  | 7.79        | 7.31        | 2.99        | 9.24         | 3.64 | 0.00        | 0.00        | 0.45        | 0.50         | 1.57  | 2.99  | 0.00 | 0.00  | 0.00  | 0.00                              | 0.65                                  |
| Ethylbenzene                                        | 0.00  | 0.00        | 0.00        | 0.00        | 0.00         | 1.33 | 4.26        | 5.13        | 4.25        | 3.75         | 0.00  | 0.00  | 0.00 | 6.13  | 3.07  | 4.14                              | 2.78                                  |
| Guaiacol                                            | 8.91  | 3.35        | 2.46        | 1.49        | 1.96         | 3.67 | 0.95        | 1.11        | 1.10        | 1.14         | 2.58  | 1.49  | 0.00 | 0.00  | 0.27  | 0.11                              | 0.27                                  |
| 2-Propanone, 1-(4-<br>hydroxy-3-<br>methoxyphenyl)- | 0.77  | 2.00        | 5.58        | 2.99        | 4.75         | 2.46 | 0.00        | 0.00        | 0.00        | 0.00         | 5.64  | 2.99  | 0.00 | 0.00  | 0.45  | 0.16                              | 0.00                                  |
| Benzene, 1-ethyl-2-<br>methyl-                      | 0.00  | 0.00        | 0.00        | 0.00        | 0.00         | 2.68 | 3.85        | 7.47        | 3.08        | 2.77         | 0.00  | 0.00  | 0.00 | 0.00  | 6.14  | 0.00                              | 0.00                                  |
| Naphthalene, 2-methyl-                              | 0.00  | 0.00        | 0.00        | 0.00        | 0.00         | 0.00 | 3.62        | 4.55        | 3.25        | 2.99         | 0.00  | 0.00  | 0.00 | 3.12  | 2.16  | 2.15                              | 3.19                                  |
| Benzene, 1,2,4-<br>trimethyl-                       | 0.00  | 0.00        | 0.00        | 0.26        | 0.00         | 0.60 | 2.60        | 3.08        | 3.45        | 3.85         | 0.00  | 0.26  | 0.00 | 0.00  | 3.86  | 0.00                              | 4.23                                  |

|                          |      |      |      |      |      |      |      |      |      |      |      |      |      |      |      |      |      |
|--------------------------|------|------|------|------|------|------|------|------|------|------|------|------|------|------|------|------|------|
| Furan, 3-methyl-         | 4.68 | 3.45 | 3.20 | 0.00 | 4.10 | 1.90 | 0.00 | 0.00 | 0.00 | 0.00 | 0.00 | 0.00 | 0.00 | 0.00 | 0.00 | 0.00 | 0.00 |
| Phenol, 2,6-dimethoxy-   | 1.96 | 0.78 | 0.87 | 0.27 | 0.26 | 3.99 | 0.81 | 0.97 | 1.00 | 0.92 | 1.29 | 0.27 | 0.00 | 0.00 | 0.23 | 0.00 | 0.00 |
| Naphthalene              | 0.27 | 0.00 | 0.00 | 0.00 | 0.16 | 0.00 | 1.22 | 1.42 | 0.85 | 0.87 | 0.00 | 0.00 | 0.00 | 1.89 | 0.56 | 0.21 | 1.27 |
| 2,4-Dimethylfuran        | 1.44 | 1.26 | 1.16 | 0.75 | 1.44 | 0.70 | 0.00 | 0.00 | 0.00 | 0.00 | 0.47 | 0.75 | 0.00 | 0.00 | 0.00 | 0.00 | 0.00 |
| HMF                      | 0.38 | 0.28 | 0.54 | 0.86 | 0.10 | 0.73 | 0.00 | 0.00 | 0.00 | 0.00 | 2.13 | 0.86 | 0.00 | 0.00 | 0.00 | 0.00 | 0.00 |
| 1,4-Dihydronaphthalene   | 0.00 | 0.00 | 0.00 | 0.00 | 0.00 | 0.26 | 1.07 | 1.26 | 0.95 | 1.03 | 0.00 | 0.00 | 0.00 | 0.00 | 0.54 | 0.37 | 0.00 |
| Ethanone, 1-(2-furanyl)- | 0.28 | 0.44 | 0.57 | 0.88 | 0.65 | 0.20 | 0.00 | 0.00 | 0.00 | 0.00 | 1.00 | 0.88 | 0.00 | 0.00 | 0.00 | 0.00 | 0.00 |
| Acrylic acid             | 0.96 | 0.33 | 0.00 | 0.24 | 0.33 | 0.00 | 0.00 | 0.00 | 0.00 | 0.00 | 0.05 | 0.24 | 0.00 | 0.00 | 0.00 | 0.00 | 0.00 |
| Cellobiose               | 0.00 | 0.48 | 0.33 | 0.25 | 0.00 | 0.00 | 0.00 | 0.00 | 0.00 | 0.00 | 0.00 | 0.25 | 0.00 | 0.00 | 0.00 | 0.00 | 0.00 |



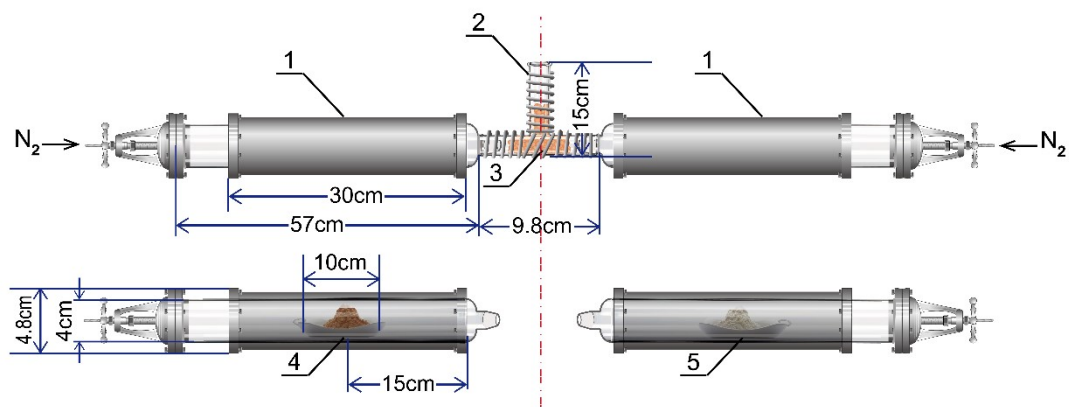

**Fig. S1.** Dimensioned schematic diagram of the segmented co-pyrolysis device. (1) Pyrolysis raw material heating device; (2) Catalyst heating device; (3) Ex-situ catalyst (globosity HZSM-5); (4) Quartz boat with CAS samples; (5) Quartz boat with LDPE samples.
